# Supplementary material
Source: PubMed Central journal article supplement (PMC2427303)
Supplement: mmc1.pdf [file mmc1.pdf]

## Report

# Genome-wide High-Density SNP-Based Linkage Analysis of Infantile Hypertrophic Pyloric Stenosis

## Identifies Loci on Chromosomes 11q14-q22 and Xq23

K. Everett, B. Chioza, C. Georgoula, A. Reece, F. Capon, K. Parker, C. Cord-Udy, P. McKeigue, S. Mitton, A. Pierro, P. Puri, H.M. Mitchison, E. Chung, and R.M. Gardiner

**Figure S1. Pedigree Diagrams for All Families Included in Analysis, Showing All Individuals on Whom There Is Information**

Family 1.

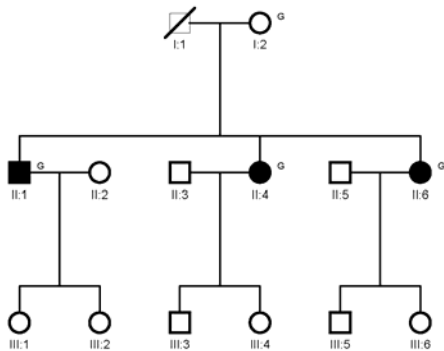

Family 2.

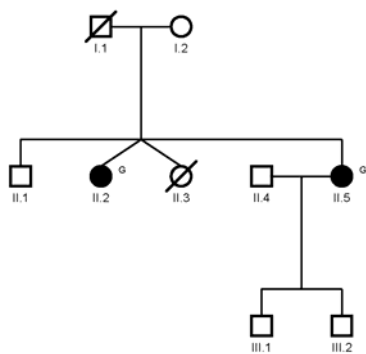

Family 3.

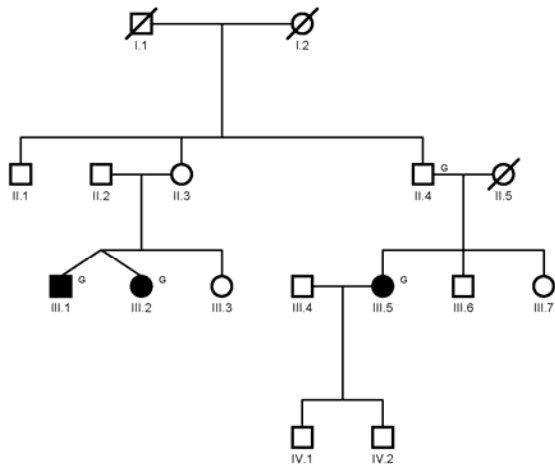

Family 5.

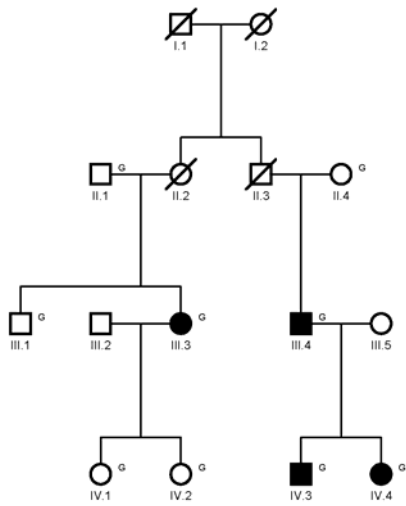

Family 6.

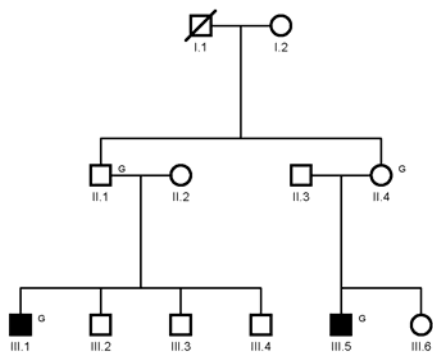

Family 7.

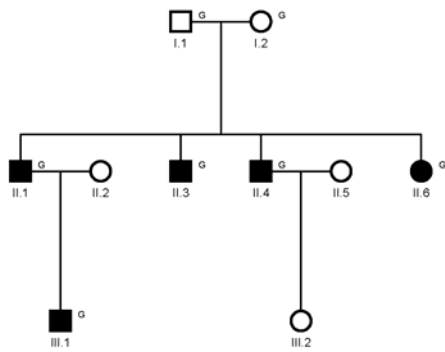

Family 9.

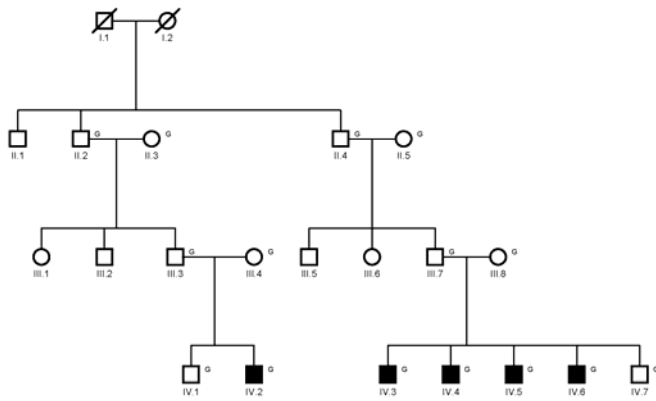

Family 10.

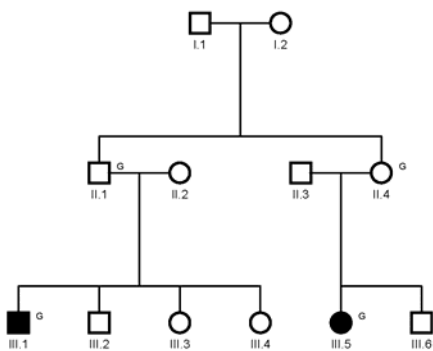

Family 11.

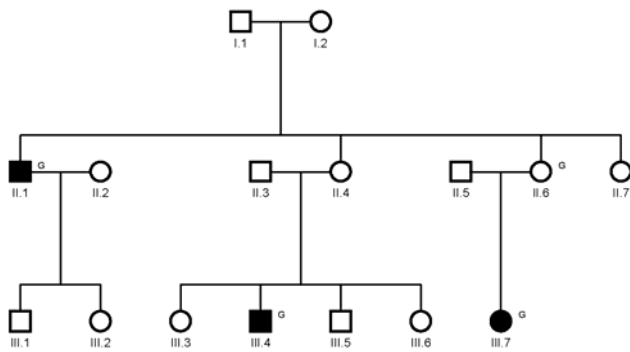

Family 13.

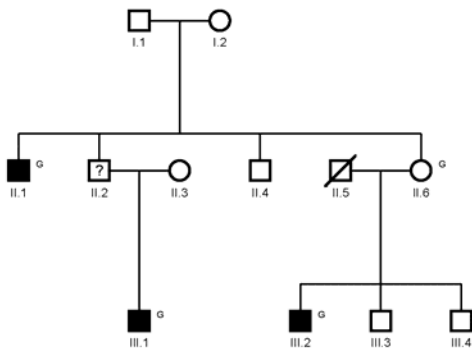

Family 14.

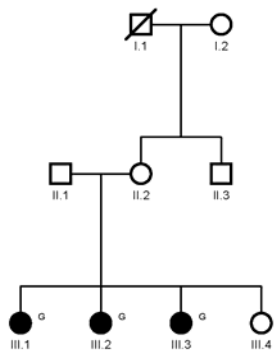

Family 15.

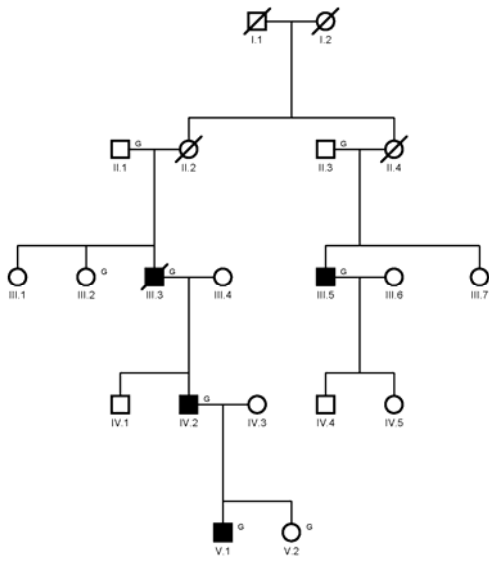

Family 16.

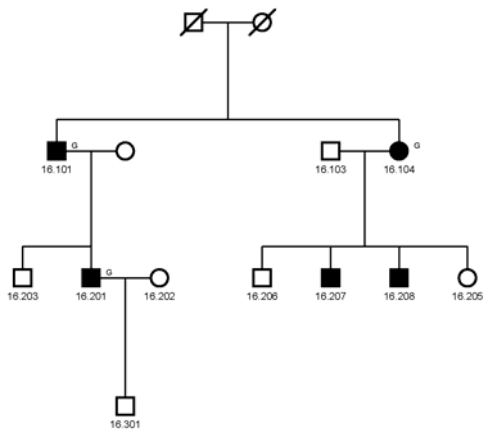

Family 17.

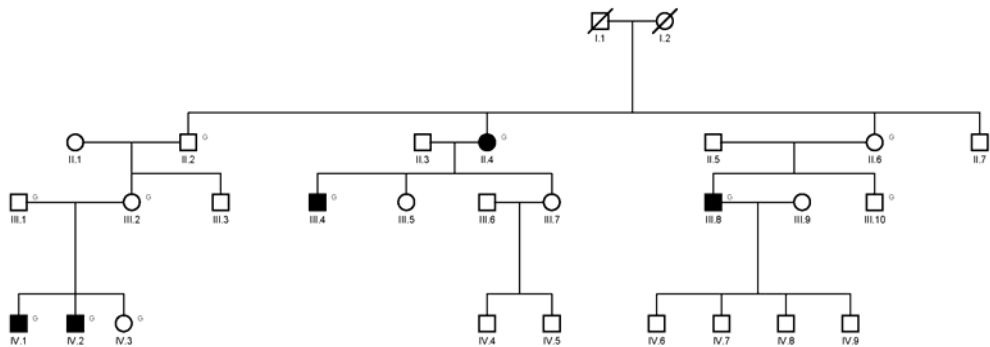

Family 18.

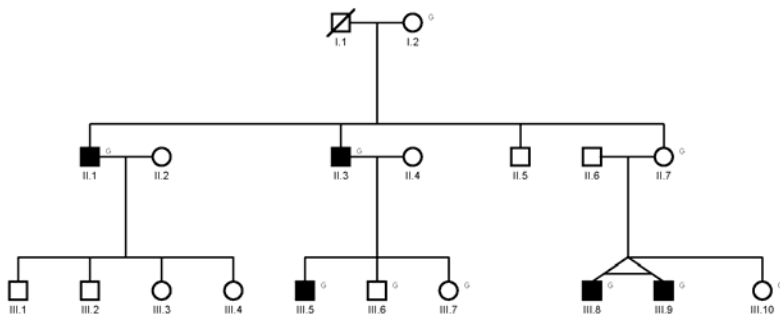

Family 19.

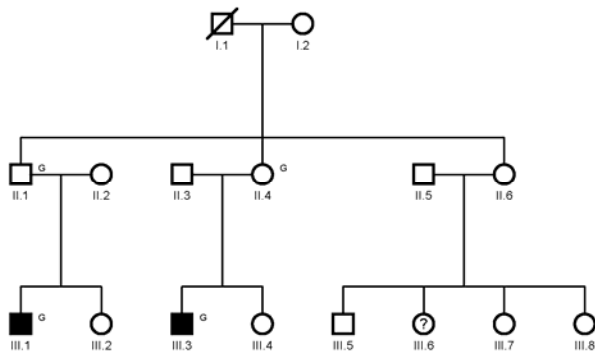

Family 20.

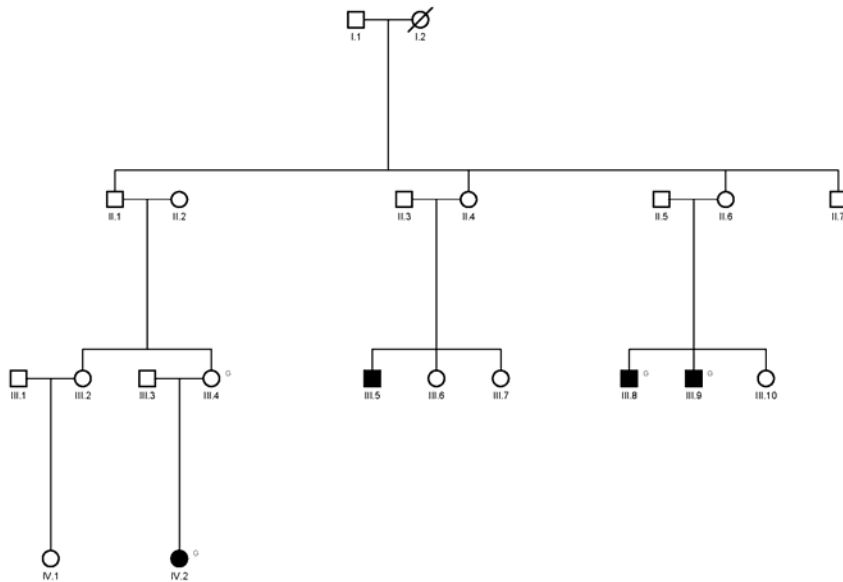

Family 21.

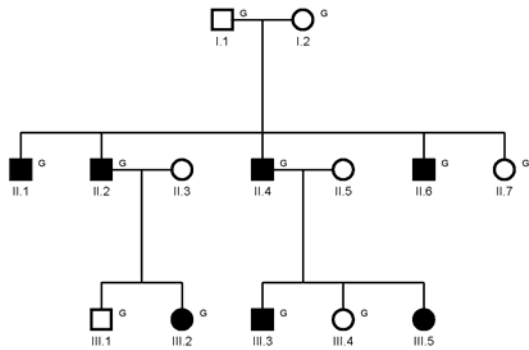

Family 22.

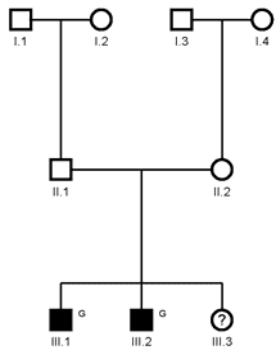

Family 23.

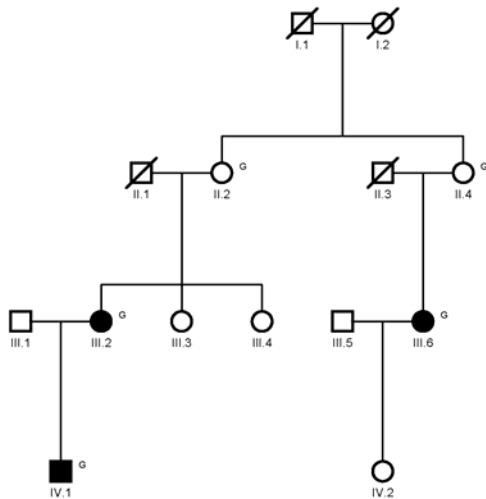

Family 25.

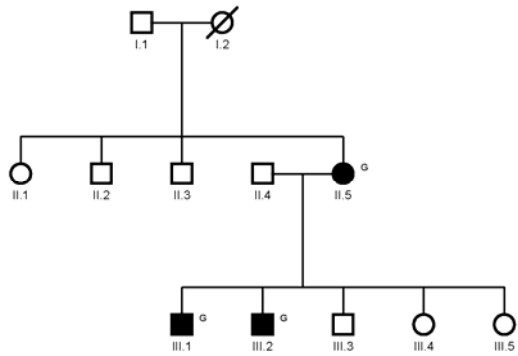

Family 26.

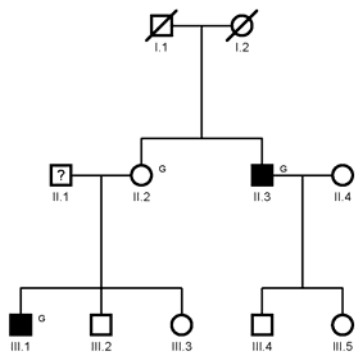

Family 27.

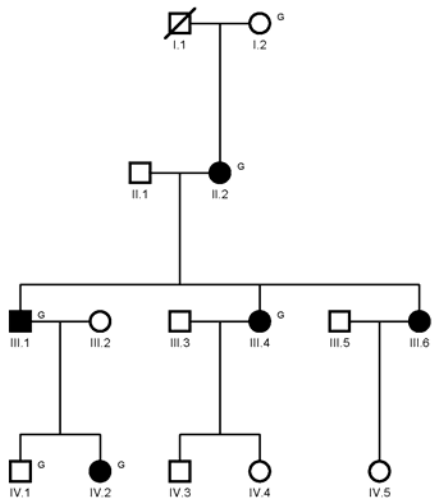



Family 28.

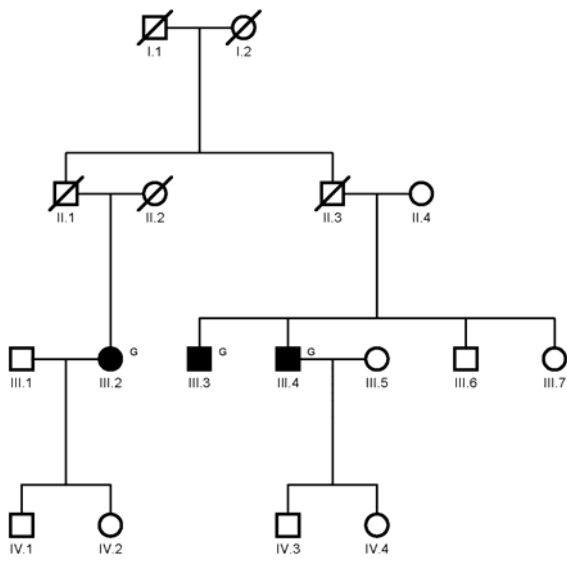

Family 29.

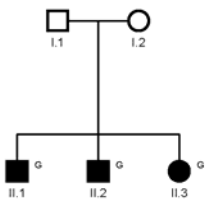

Family 30.

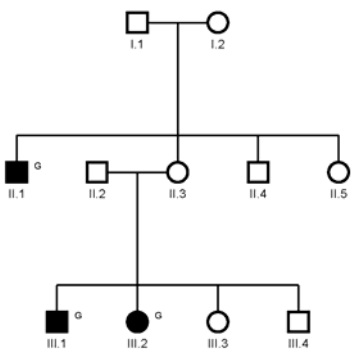

Family 32.

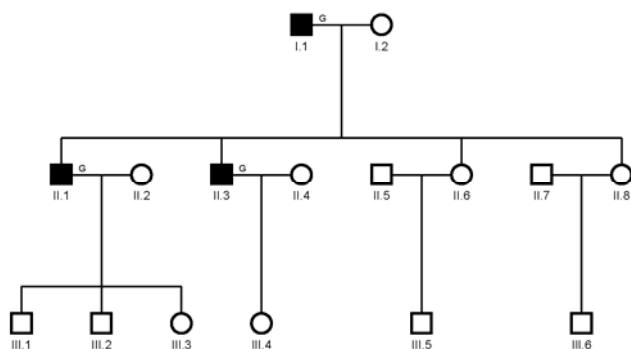

Family 34.

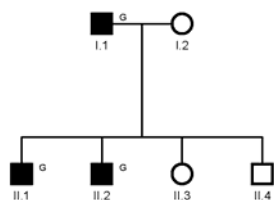

Family 39.

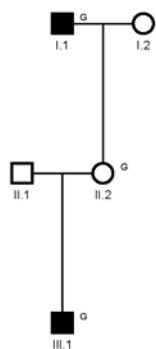

Family 76.

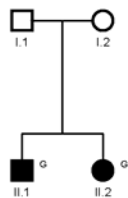

Family 79.

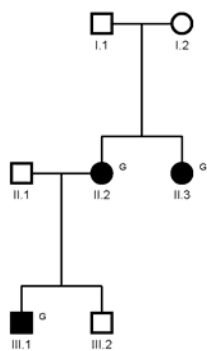

Family 81.

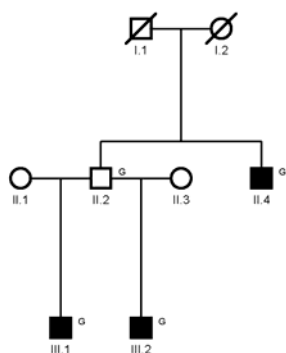

Family 84.

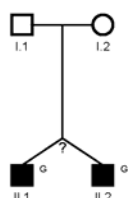

Family 86.

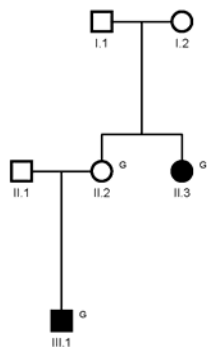

Family 93.

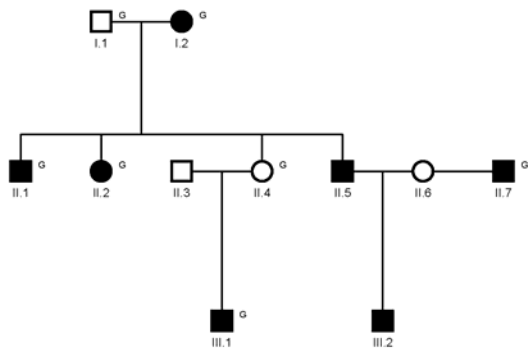

Family 101.

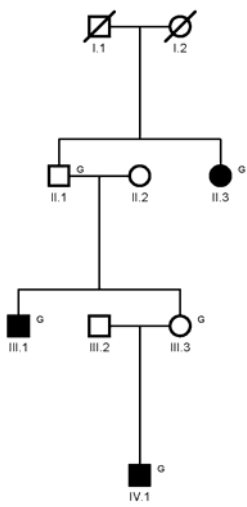

Family 115.

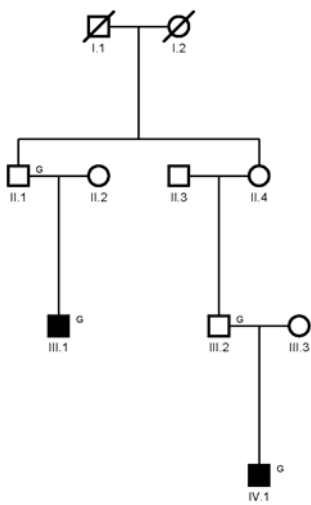

Family 119.

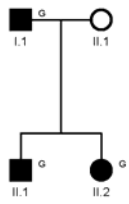

Family 131.

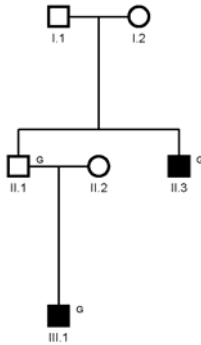

Family 135.

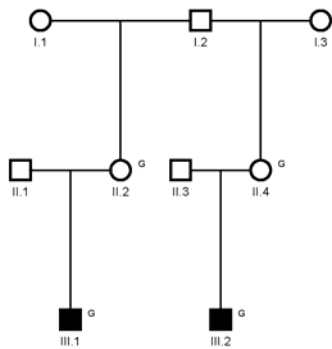

Family 146.

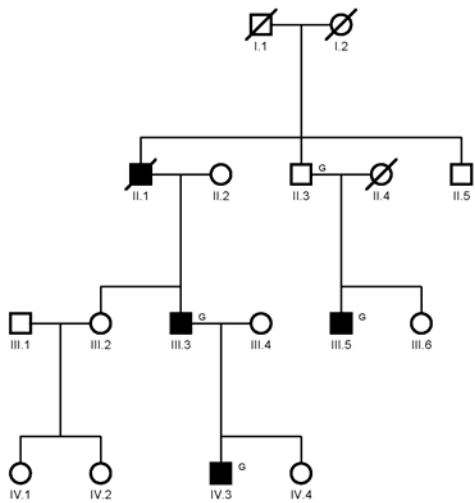

Family 162.

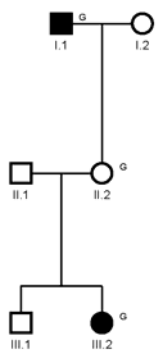

Family 168.

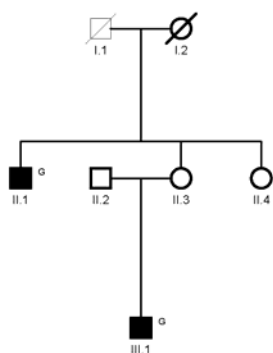

Family 170.

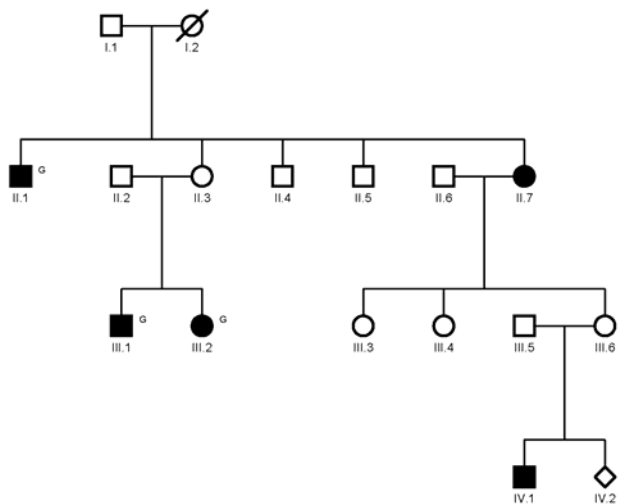

Family 175.

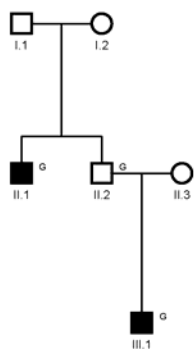

Family 179.

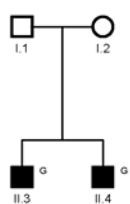

Family 184.

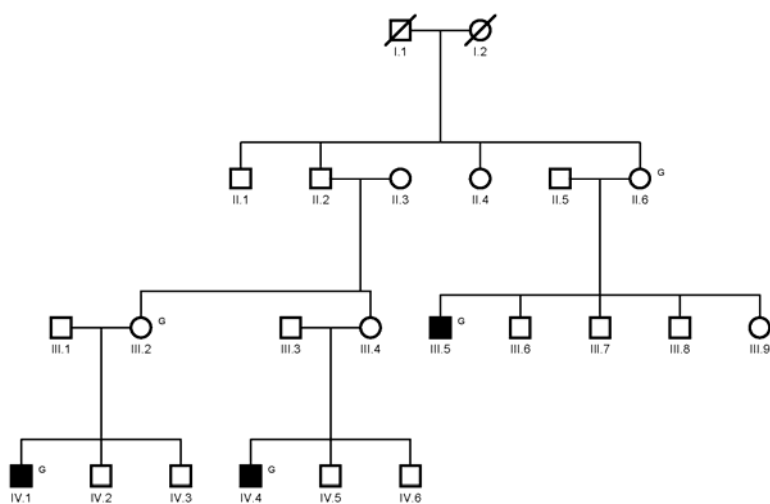

Family 192.

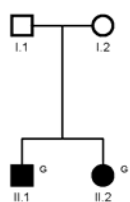

Family 204.

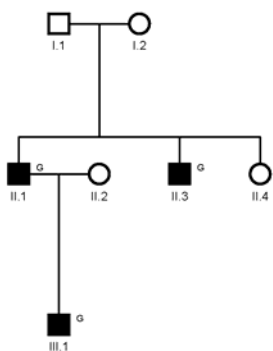

Family 214.

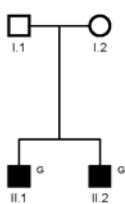

Family 215.

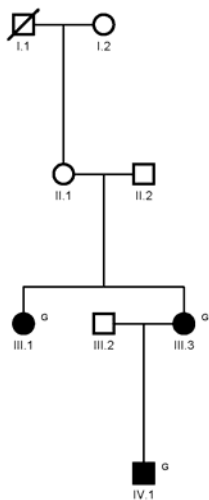

Family 260.

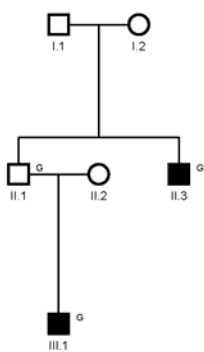



Family 262.

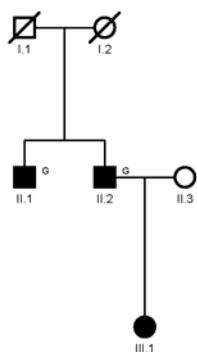

Family 278.

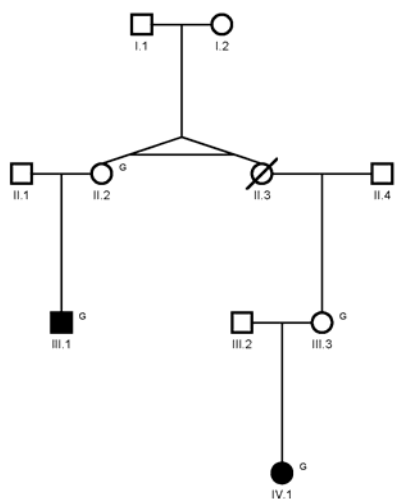

Family 288.

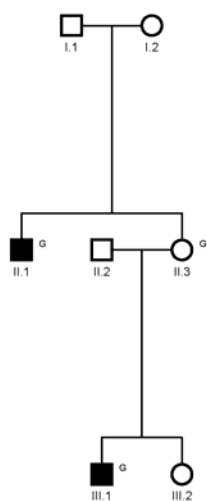

Family 290.

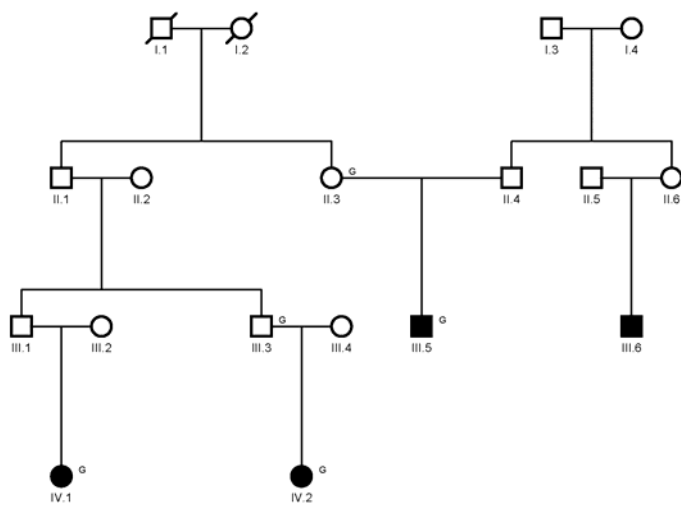

Family 304.

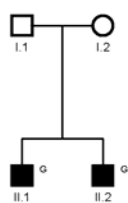

Family 319.

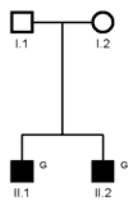

Family 326.

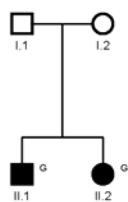

Family 327.

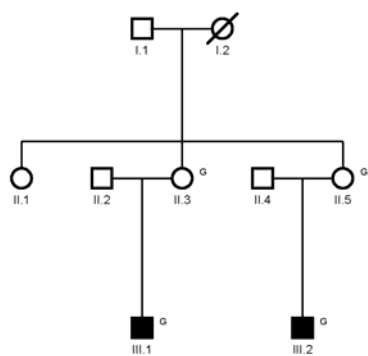

Family 333.

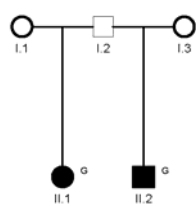

Family 345.

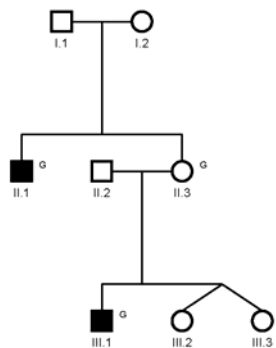

Family 346.

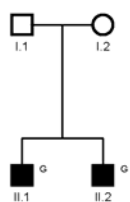

Family 353.

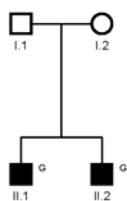

Family 360.

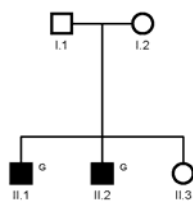

Family 364.

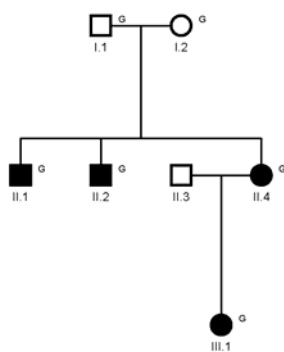

Family 365.

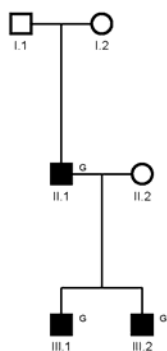

Family 369.

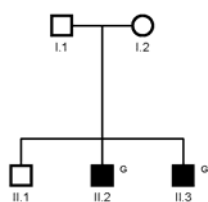

Family 373.

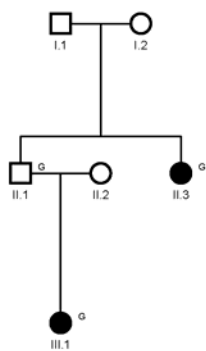

Family 379.

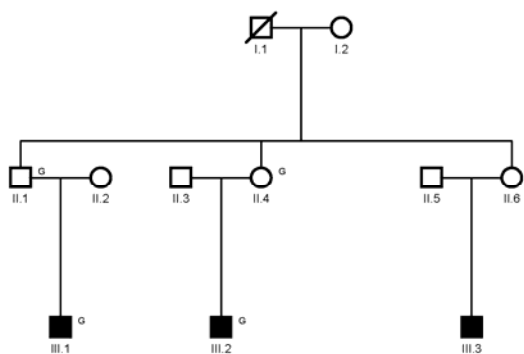

Family 389.

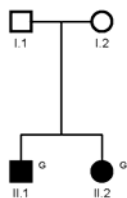

Family 414.

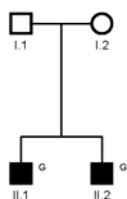

Family 415.

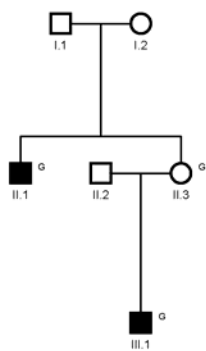

Family 420.

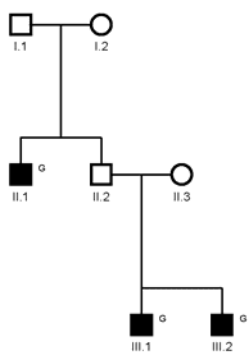

Family 435.

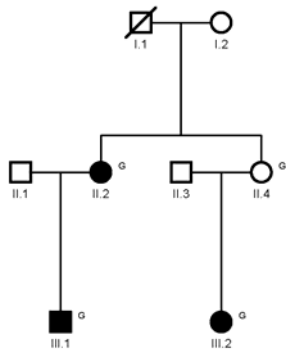

Family 441.

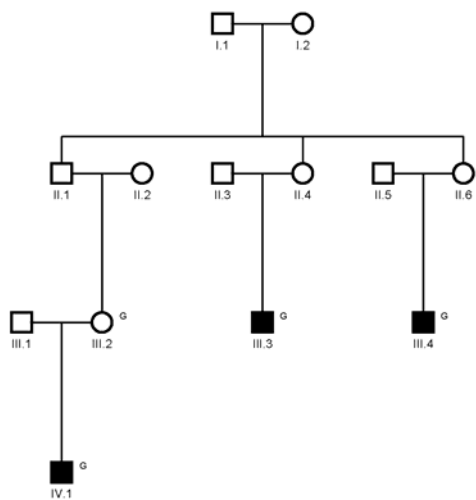

Family 457.

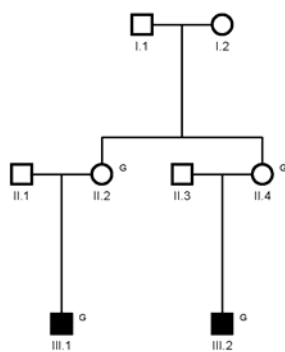

Family 478.



Family 479.

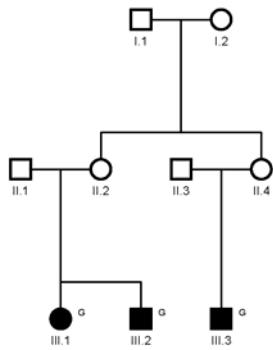

Family 481.

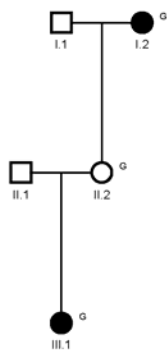

Family 485.

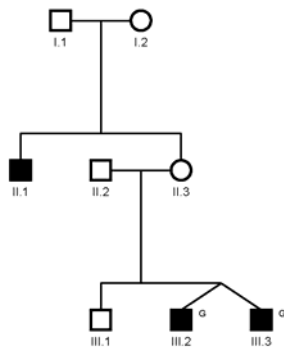

Individuals with a line through them are dead. Individuals marked with a G have been genotyped with the Illumina Linkage IV Panel of SNPs. Shaded individuals are affected. Standard nomenclature is used for the identification of individuals.



**Figure S2. Pedigree and Predicted Haplotype Structure of Those Families that Individually Provide the Strongest Evidence for Linkage to Chromosomes 11 and/or the X Chromosome**

Family 1. Chromosome 11

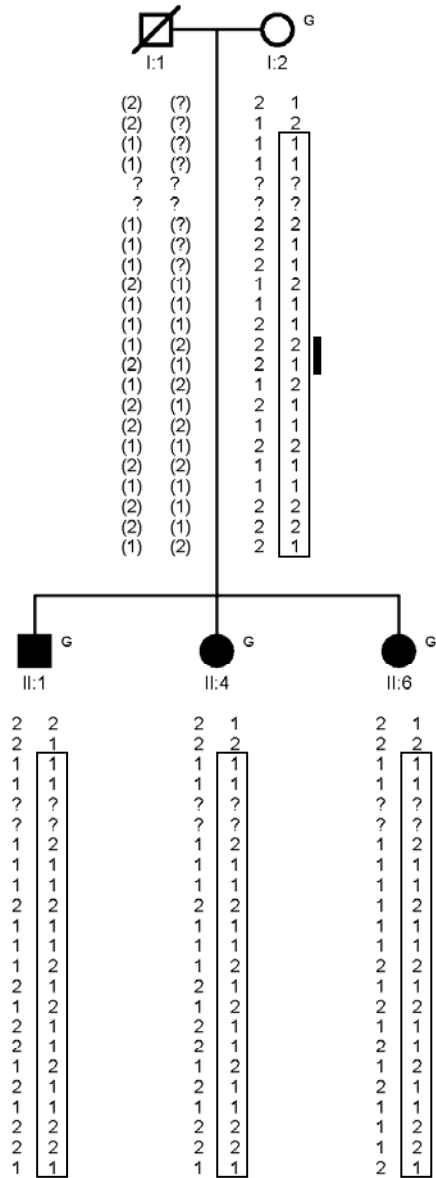

Family 5. Chromosome 11

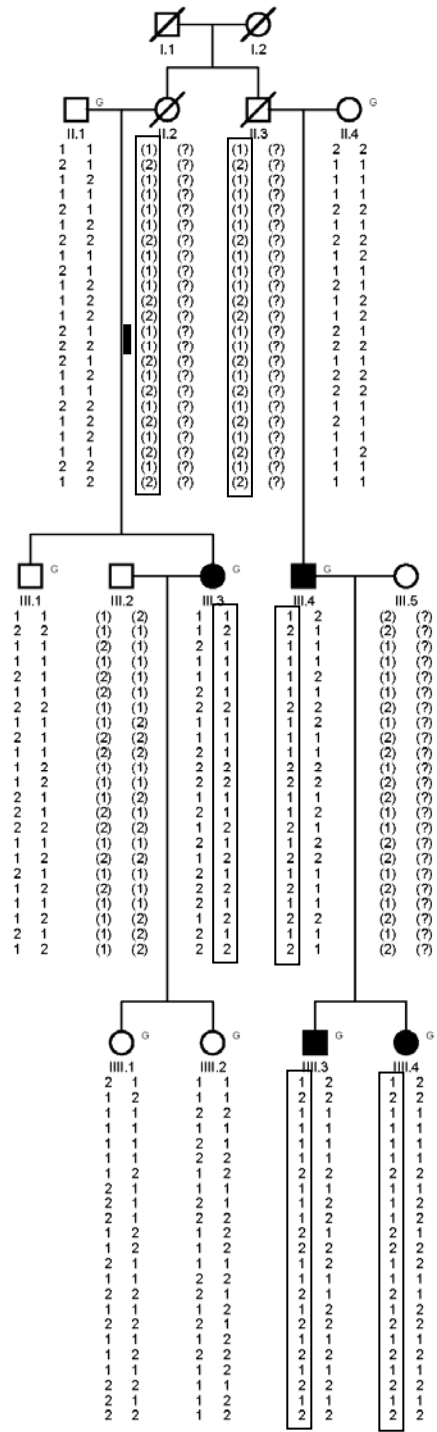

Family 15. Chromosome 11

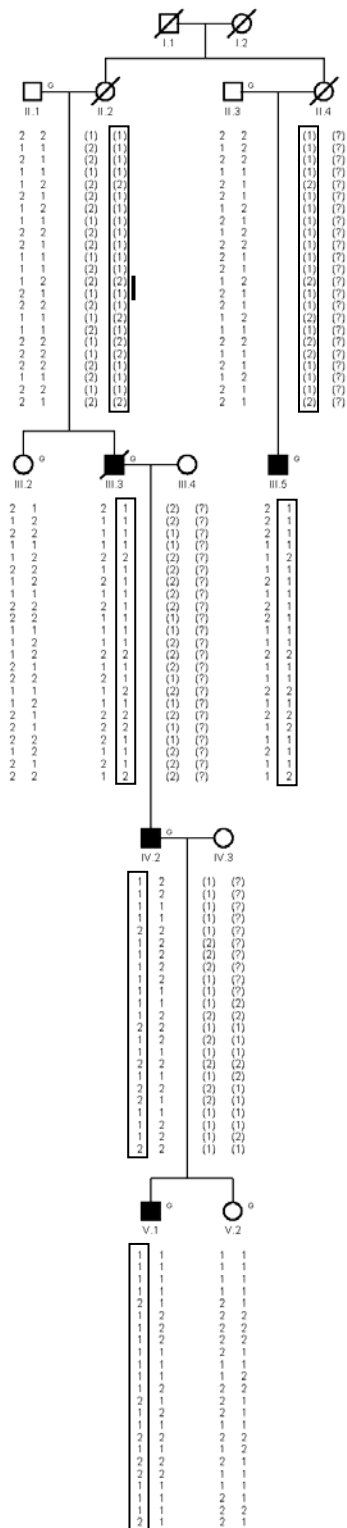

Family 23. Chromosome 11

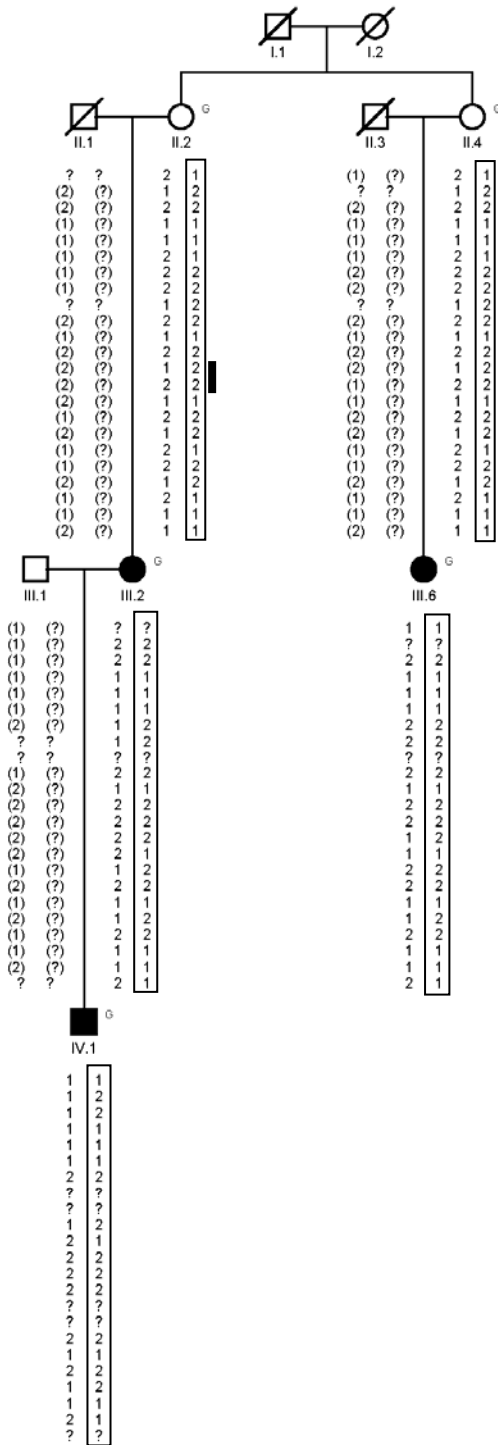

Family 29. Chromosome 11

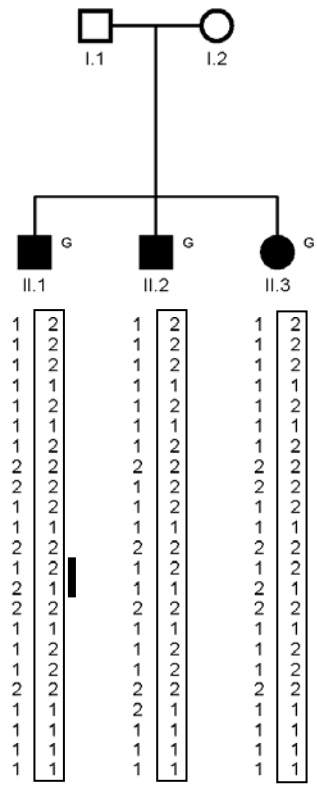

Family 93. Chromosome 11

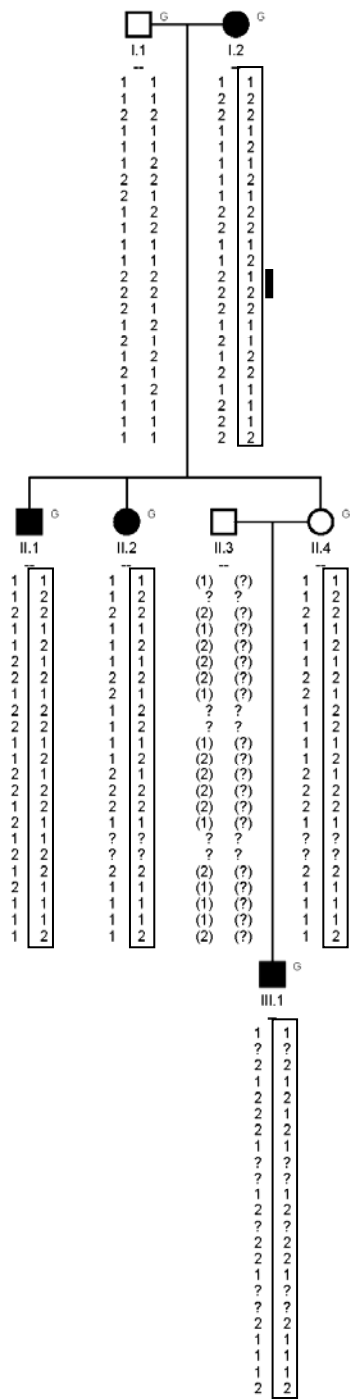



Family18. X chromosome

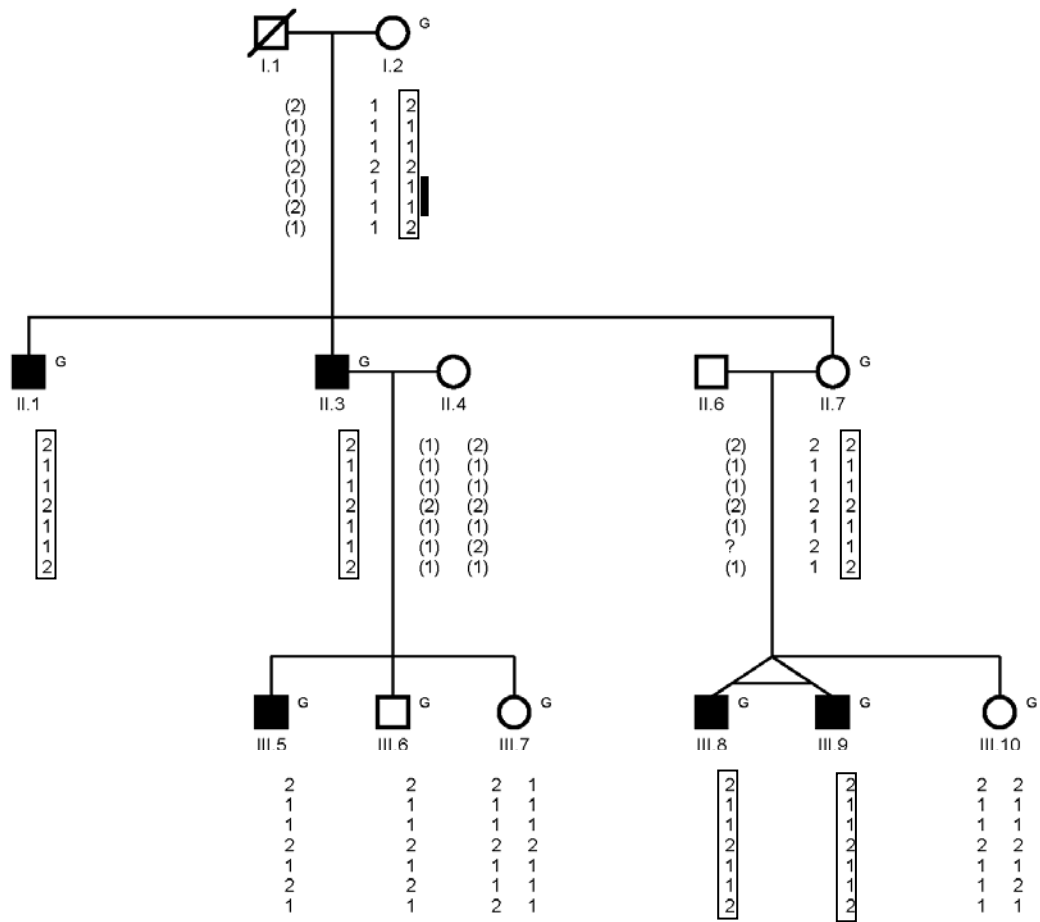



Family 170. X chromosome

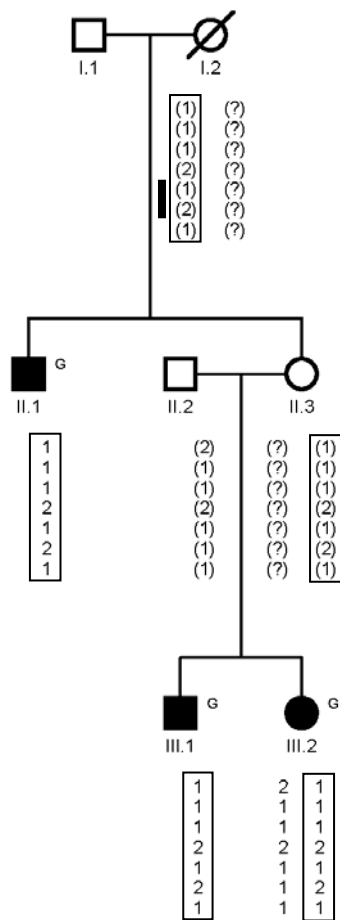

Genotyped individuals are marked with a G. Alleles in parentheses have been inferred. Genotypes given with question marks are unknown or of unknown phase. Disease-segregating chromosomal regions are boxed. SNPs which flank the proposed candidate genes, *TRPC6*, on chromosome 11, and *TRPC5*, on the X chromosome are shown with a black bar on just one ancestral disease-segregating chromosome.

**Table S1.  $Z_{\max}$  Scores for All Analyzed Families for the Critical Regions on Chromosome 11 and the X Chromosome**

| <b>Family Number</b> | <b>Chromosome 11</b> | <b>X Chromosome</b> |
|----------------------|----------------------|---------------------|
| 1                    | 2.44                 | -0.43               |
| 2                    | 0.18                 | 0.59                |
| 3                    | 0.01                 | 1                   |
| 5                    | 3.51                 | 1                   |
| 6                    | -0.54                |                     |
| 7                    | -0.59                | -0.33               |
| 9                    | -0.86                | -0.24               |
| 10                   | -0.3                 |                     |
| 11                   | -0.33                | 0.53                |
| 13                   | 0.56                 | -0.48               |
| 14                   | 0.83                 | -0.35               |
| 15                   | 3.43                 | 1.29                |
| 16                   | 1.26                 | 1                   |
| 17                   | -0.09                | 0.12                |
| 18                   | -0.2                 | 3.68                |
| 19                   | 1.72                 |                     |
| 20                   | 0.65                 | 0.65                |
| 21                   | 0.25                 | 0.96                |
| 22                   | 1.41                 | 1                   |
| 23                   | 2.5                  | -0.06               |
| 25                   | 1.41                 | 1                   |
| 26                   | 1                    | 0.12                |
| 27                   | 1.76                 | 1                   |
| 28                   | 1.1                  | 1                   |
| 29                   | 2.45                 | -0.47               |
| 30                   | 1.86                 | 1.25                |
| 32                   | 0                    | 1                   |
| 34                   | -0.54                | 0.51                |
| 39                   | 1                    | 1                   |
| 76                   | 1.41                 | -0.44               |
| 79                   | 1.26                 | 0.73                |
| 81                   | 0.56                 |                     |
| 84                   | 0.05                 | 0.35                |
| 86                   | 1                    | 0.58                |
| 93                   | 2.09                 | -0.3                |
| 101                  | -0.31                | -0.57               |
| 115                  | 1                    |                     |
| 119                  | 0.46                 | 0.42                |
| 131                  | -0.99                |                     |
| 135                  | 0.3                  |                     |
| 146                  | 2.45                 |                     |
| 162                  | 1                    | -1                  |
| 168                  | 0.23                 | 1.73                |
| 170                  | 1.7                  | 2.5                 |
| 175                  | 0.19                 |                     |

## American Journal of Human Genetics, Volume 82

|     |       |       |
|-----|-------|-------|
| 179 | 0.06  | -0.44 |
| 184 | -0.14 | -0.21 |
| 192 | -1.26 | 0.41  |
| 204 | 1.26  | 1     |
| 214 | 1.41  | 0.51  |
| 215 | 1.26  | 0.73  |
| 260 | 0.04  |       |
| 262 | 0.64  | 1     |
| 278 | 0.54  | 0.8   |
| 288 | 1     | -0.24 |
| 290 | 0     | 1     |
| 304 | 0.11  | -0.16 |
| 319 | 1.17  | 0.52  |
| 326 | 0.05  | 0.85  |
| 327 | 1.73  | 1.29  |
| 333 | -0.89 |       |
| 345 | -0.14 | 0.5   |
| 346 | 0.8   | 1     |
| 353 | 0.19  | 1     |
| 360 | 1.41  | 0.91  |
| 364 | 1.28  | -0.31 |
| 365 | 1.34  | -0.07 |
| 369 | -0.06 | 0.41  |
| 373 | -0.01 | 1     |
| 379 | -0.45 |       |
| 389 | 0.3   | 1     |
| 414 | 1.41  | 1     |
| 415 | -0.97 | 0.79  |
| 420 | -0.84 | 1     |
| 435 | 1.63  | -0.41 |
| 441 | 0.02  | 0.4   |
| 457 | 1.73  | -0.77 |
| 478 | 1     |       |
| 479 | 1.08  | 0.64  |
| 481 | 0.99  | 1     |
| 485 | 0.85  | 0.51  |

$Z_{\max}$  scores for the X chromosome are not available for those families not consistent with X-linked inheritance.
